# Supplementary material
Source: HighWire-hosted journal article supplement (https://www.cmajopen.ca/highwire/filestream/89435/field_highwire_adjunct_files/1/open-2022-0191-2-at.pdf)
Supplement: open-2022-0191-2-at.pdf [file open-2022-0191-2-at.pdf]

## Tables and Figures (Supplementary)

**Supplementary Table 1.** Perceived level of support in HCPs at baseline (n, 1422) and follow-up (n, 681).

|                                                                                         | Response                               | Baseline, n,1422 (%) | Follow-up, n,681 (%) |
|-----------------------------------------------------------------------------------------|----------------------------------------|----------------------|----------------------|
| Do you think you received adequate support directly from your supervisors/line managers | Felt unsupported                       | 312 (21.9%)          | 167 (24.5)           |
|                                                                                         | Felt supported                         | 689 (48.5%)          | 360 (52.9)           |
|                                                                                         | Felt neither supported nor unsupported | 421 (29.6%)          | 154 (22.6)           |

*Note.* Follow-up participants are those who also provided valid baseline support data.

**Supplementary Table 2.** Baseline cross-sectional logistic regression analysis – Odds ratios (95% Confidence Intervals) for supported vs. unsupported analysis for HCP and non-HCP collectively (n = 1543).

|                              | OR (95% CIs)*     |
|------------------------------|-------------------|
| Generalised anxiety disorder | 0.41 (0.29, 0.57) |
| Clinical insomnia            | 0.49 (0.34, 0.69) |
| Major depressive disorder    | 0.42 (0.31, 0.58) |
| Emotional exhaustion         | 0.35 (0.26, 0.46) |
| Depersonalisation            | 0.42 (0.28, 0.61) |
| Medium to high wellbeing     | 3.51 (2.59, 4.77) |

\*adjusted for age, gender identity, education, relationship status, number living in household, currently diagnosed mental health condition, currently diagnosed physical health condition.

**Supplementary Table 3.** Follow-up cross-sectional logistic regression analysis – adjusted odds ratios (95% Confidence Intervals) for supported vs. unsupported analysis for HCP and non-HCP collectively (n = 763).

|                              | OR (95% CIs)*     |
|------------------------------|-------------------|
| Generalised anxiety disorder | 0.60 (0.38, 0.95) |
| Clinical insomnia            | 0.39 (0.24, 0.64) |
| Major depressive disorder    | 0.44 (0.29, 0.67) |
| Emotional exhaustion         | 0.44 (0.30, 0.63) |
| Depersonalisation            | 0.30 (0.19, 0.47) |
| Medium to high wellbeing     | 2.84 (1.89, 4.25) |

\*adjusted for age, gender identity, education, relationship status, number living in household, currently diagnosed mental health condition, currently diagnosed physical health condition.

**Supplementary Table 4.** Linear regression analysis – adjusted coefficients (95% Confidence Intervals) for change in support from baseline to follow-up predicting the change in mental health scores from baseline to follow-up for HCP and non-HCP collectively (n = 757).

|                              | Coefficient (95% CIs)*                 |
|------------------------------|----------------------------------------|
| Generalised anxiety disorder | -0.14 (-0.26, -0.03), <i>p</i> = 0.014 |
| Clinical insomnia            | -0.15 (-0.27, -0.02), <i>p</i> = 0.020 |
| Major depressive disorder    | -0.18 (-0.30, -0.06), <i>p</i> = 0.002 |
| Burnout (EEDP2Q)             | -0.07 (-0.14, -0.00), <i>p</i> = 0.050 |
| Wellbeing (SWEMWBS)          | 0.20 (0.10, 0.30), <i>p</i> < 0.001    |

\*adjusted for age, gender identity, education, relationship status, number living in household, currently diagnosed mental health condition, currently diagnosed physical health condition, and baseline level of support.

**Supplemental Figure 1.** Graphical illustration of the distribution of responses for perceived level of workplace support at baseline (n = 1422).

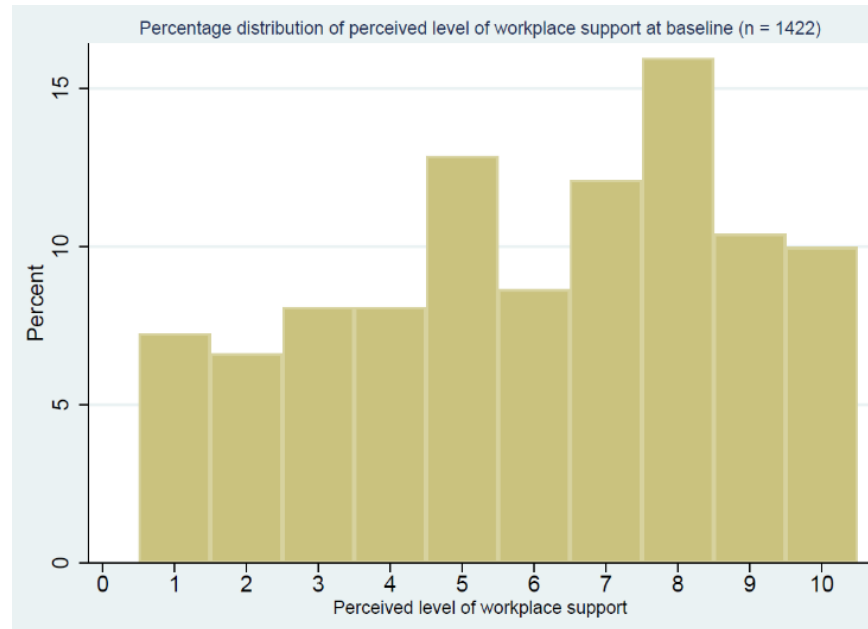

Appendix 2, as supplied by the authors. Appendix to: Siddiqui I, Gupta J, Collett G, et al. Perceived workplace support and mental health, well-being and burnout among health care professionals during the COVID-19 pandemic: a cohort analysis. *CMAJ Open* 2023. DOI:10.9778/cmajo.20220191. Copyright © 2023 The Author(s) or their employer(s). To receive this resource in an accessible format, please contact us at [cmajgroup@cmaj.ca](mailto:cmajgroup@cmaj.ca).

**Supplemental Figure 2.** Graphical illustration of the distribution of responses for perceived level of workplace support at follow-up (n = 681).

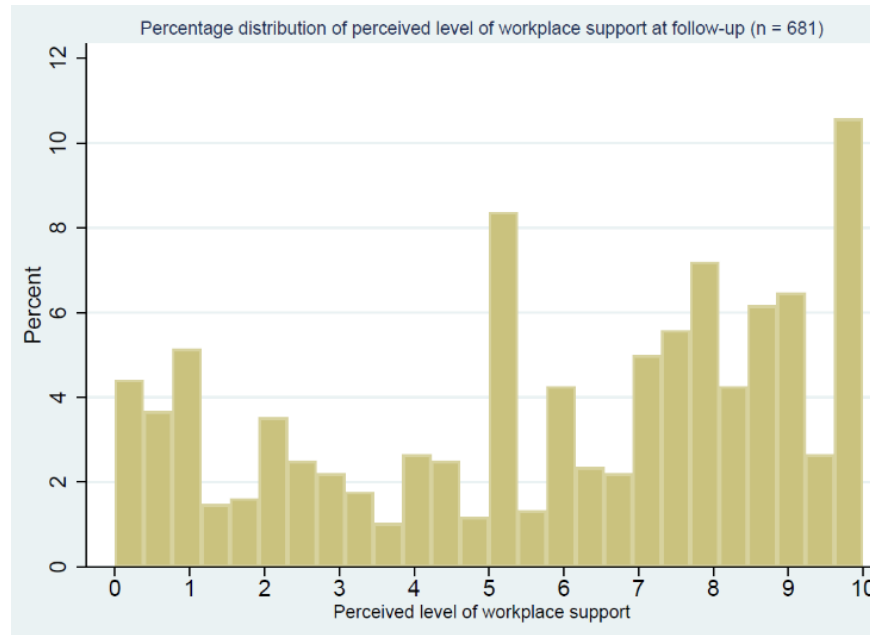

Appendix 2, as supplied by the authors. Appendix to: Siddiqui I, Gupta J, Collett G, et al. Perceived workplace support and mental health, well-being and burnout among health care professionals during the COVID-19 pandemic: a cohort analysis. *CMAJ Open* 2023. DOI:10.9778/cmajo.20220191. Copyright © 2023 The Author(s) or their employer(s). To receive this resource in an accessible format, please contact us at [cmajgroup@cmaj.ca](mailto:cmajgroup@cmaj.ca).

**Supplemental Figure 3.** Graphical illustration of the distribution of the change in perceived level of workplace support from baseline and follow-up (n = 681).

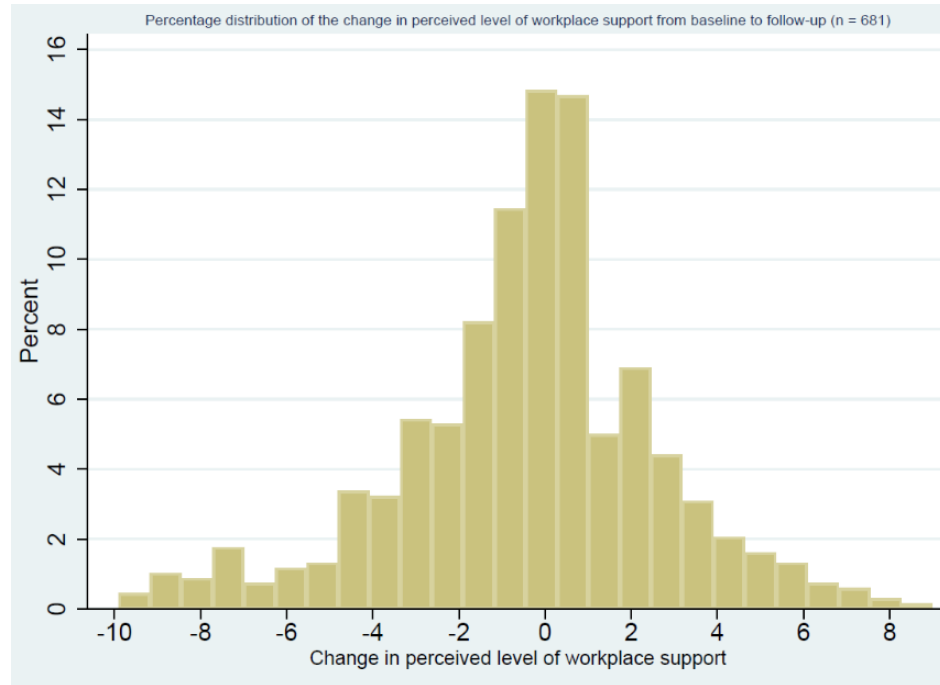

Appendix 2, as supplied by the authors. Appendix to: Siddiqui I, Gupta J, Collett G, et al. Perceived workplace support and mental health, well-being and burnout among health care professionals during the COVID-19 pandemic: a cohort analysis. *CMAJ Open* 2023. DOI:10.9778/cmajo.20220191. Copyright © 2023 The Author(s) or their employer(s). To receive this resource in an accessible format, please contact us at [cmajgroup@cmaj.ca](mailto:cmajgroup@cmaj.ca).
